# Supplementary material for: Three novel supramolecular hybrid compounds based on keggin polytungstates
Source: Royal Society of Chemistry journal article supplement (doi:10.1039/c0ce00897d), 2011-01-01
Supplement: c0ce00897d.pdf [file c0ce00897d.pdf]

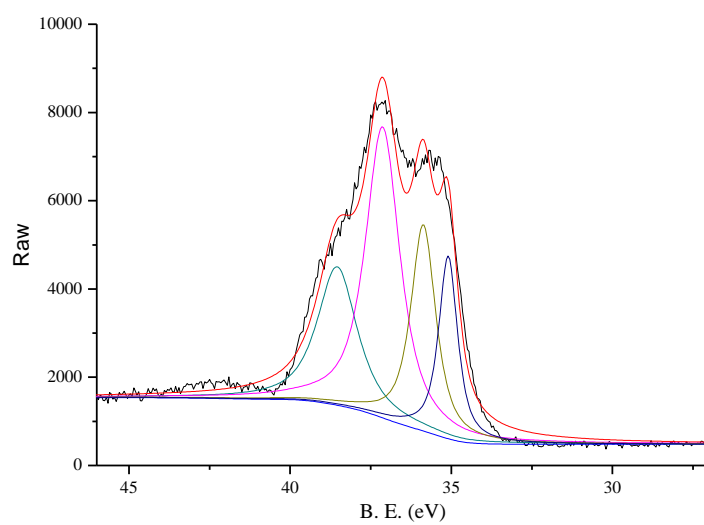

Fig. s1. The XPS spectrum for the compound **1**. XPS measurements were performed on single crystals with ESCALAB MARK II apparatus, using the Mg  $K\alpha$ (1253.6eV) achromatic X-ray radiation source.

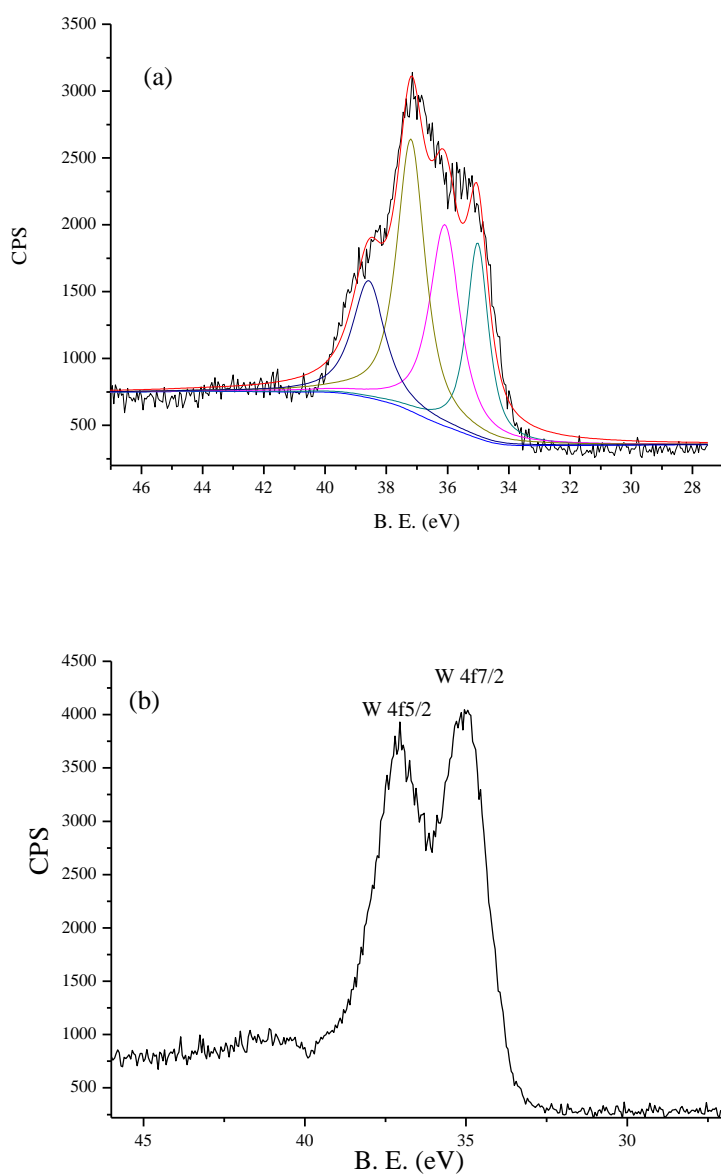

Fig.s2. (a) The XPS spectrum for compound 2. (b) The XPS spectrum for compound 3.

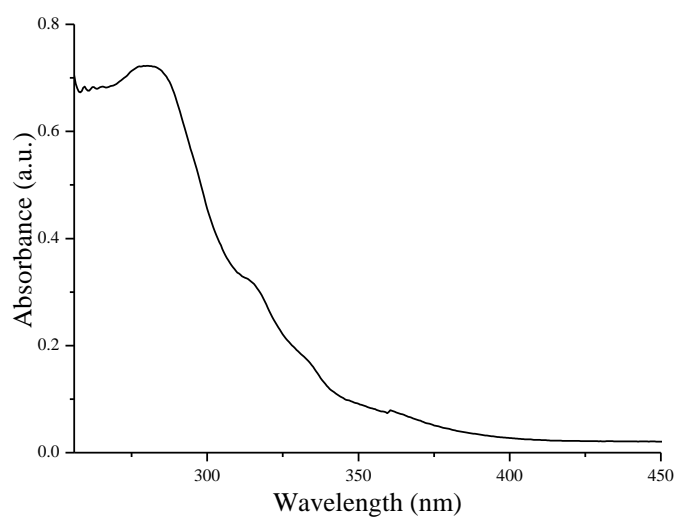

fig. s3. The UV-Vis spectrum for the compound **1**. The UV-Vis spectra were recorded on a Shimadzu UV3100 spectrophotometer.

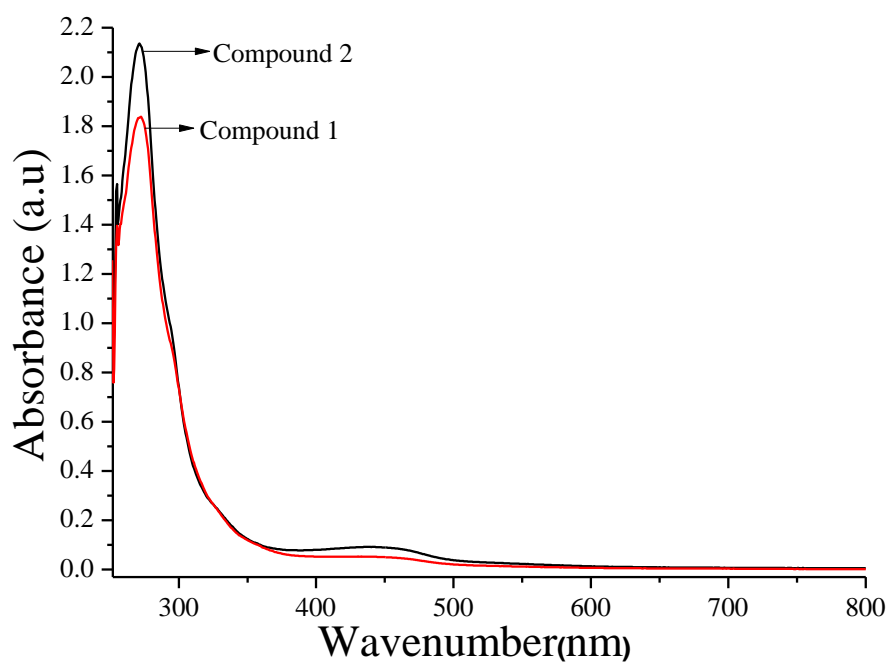

Fig.s4. The UV-Vis spectra for compound **1** and **2**. Compound **1** and **2** were analyzed as saturated N,N-dimethyl formamide solutions.

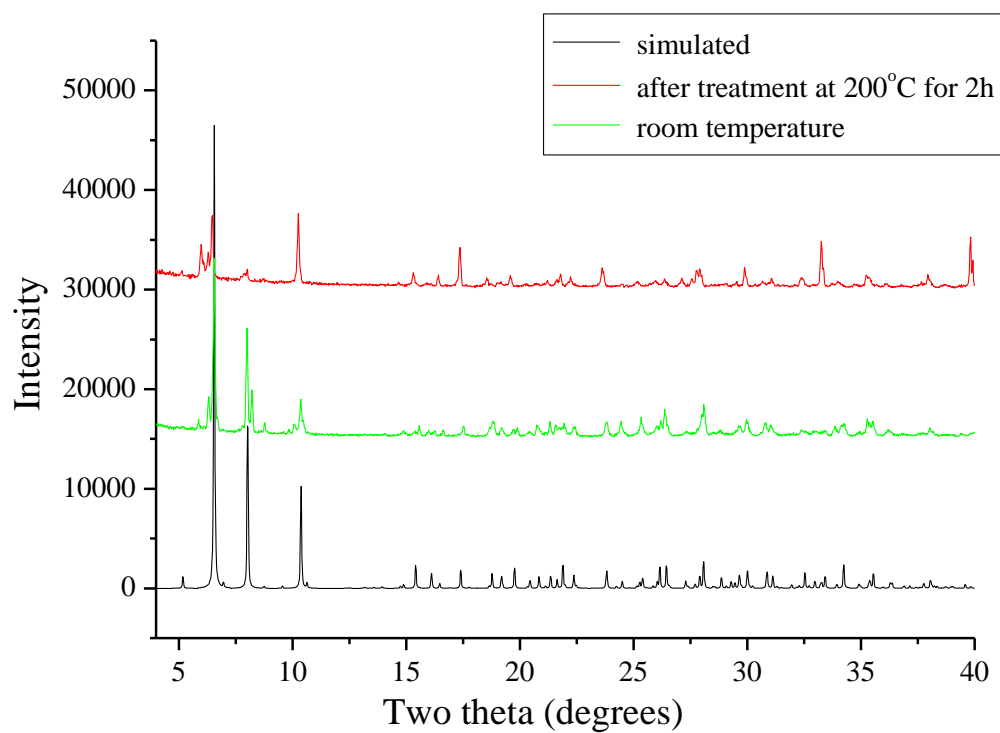

Fig. s5. The XRD pattern for compound **1**. The X-ray powder diffraction pattern was obtained with a Scintag X1 powder diffractometer system using  $K\alpha$  radiation with a variable divergent slit and a solid-state detector.

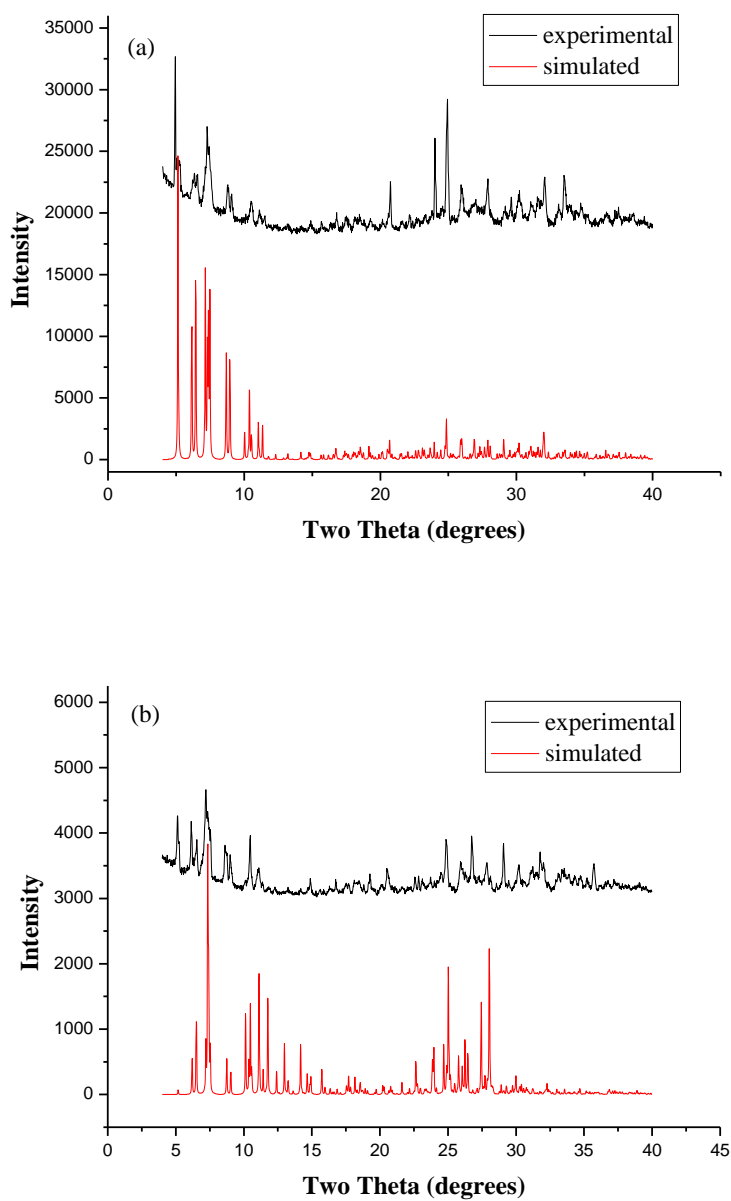

Fig. s6. (a) The XRD spectrum for compound 1. (b) The XRD spectrum for compound 2.

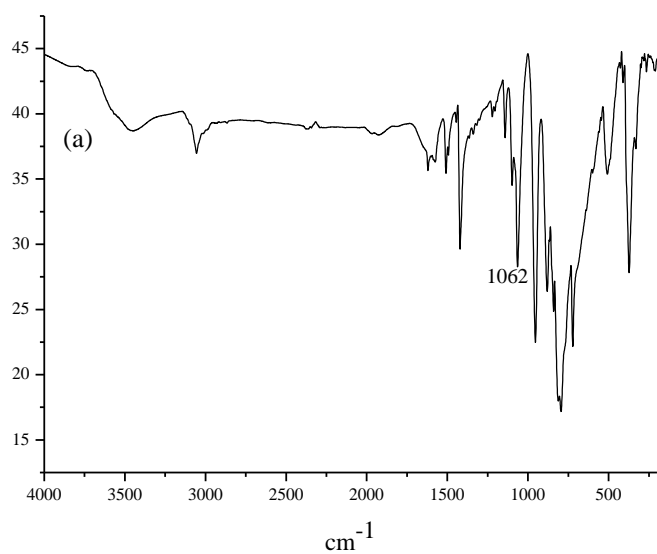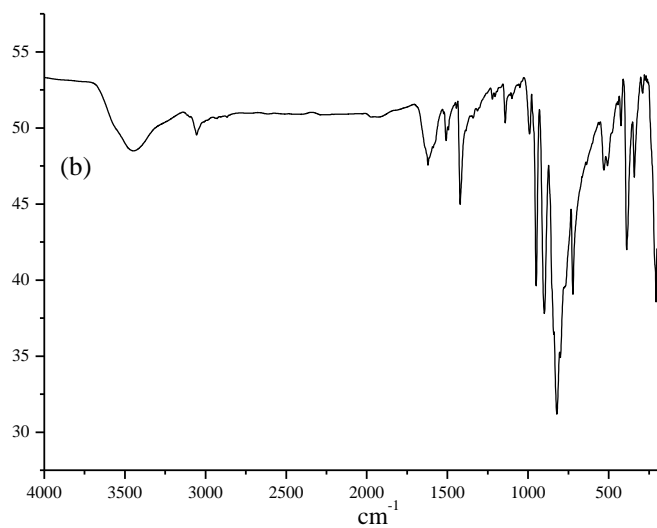

Fig. s7. (a) The IR spectrum for the compound **1**. The strong band at  $1062\text{cm}^{-1}$  is associated with the P centre of the POM in **1**. (b) The IR spectrum for the compound **2**.

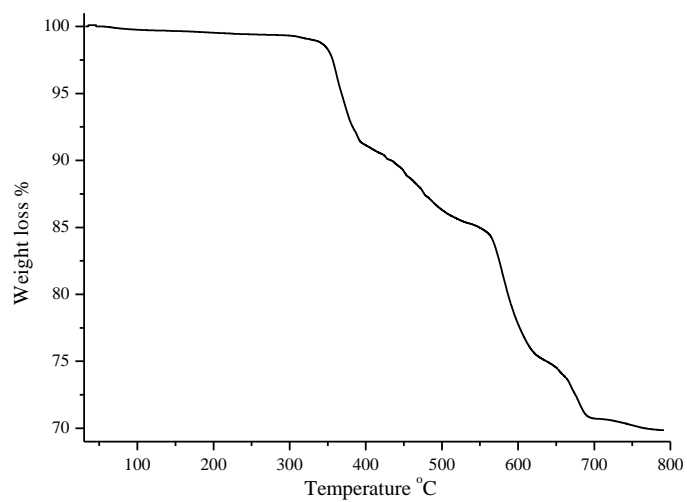

Fig. s8. The TG curve for the compound **1**. Thermogravimetric analysis (TG) data were recorded with a thermal analysis instrument (SDT 2960, TA Instruments, New Castle, DE) with the heating rate of  $10^{\circ}\text{C min}^{-1}$  in an air flow.



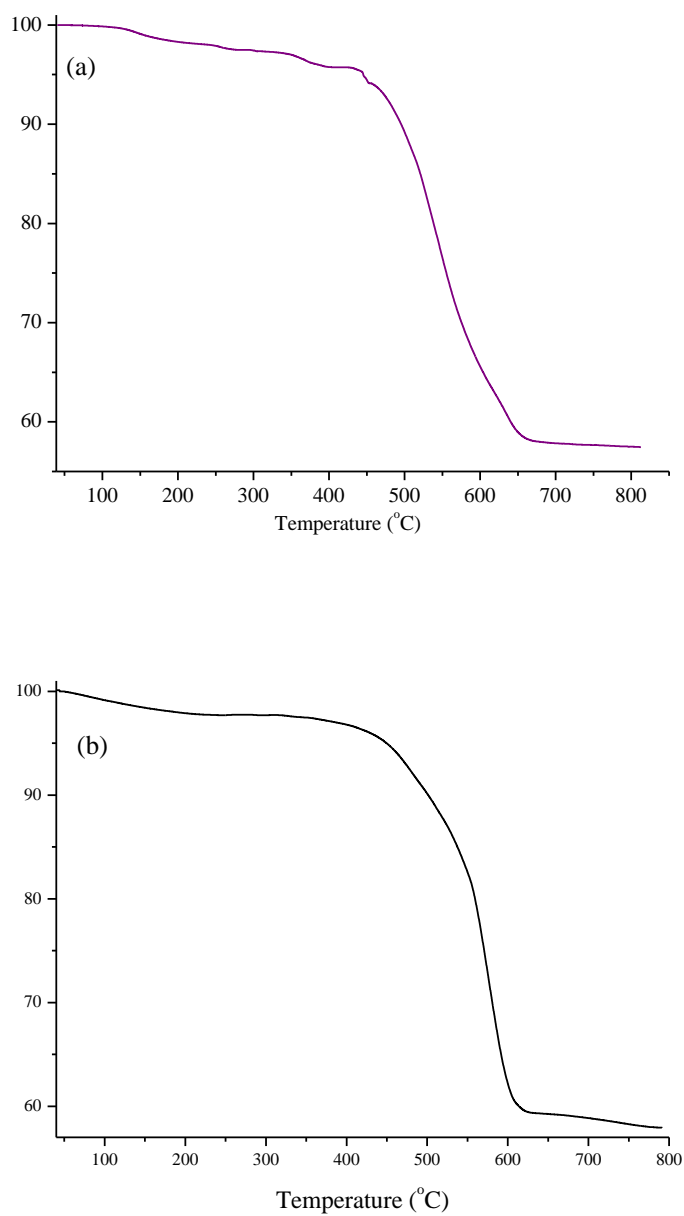

Fig. s9. (a) The TG spectrum for compound 2. (b) The TG spectrum for compound 3.

Table s1. The hydrogen bonds in compound **2**.

| D-H...A         | D-H[Å] | H...A[Å] | D...A[Å] | D-H...A[°] | symop-for-A   |
|-----------------|--------|----------|----------|------------|---------------|
| C27A-H27A...O9  | 0.93   | 2.39     | 3.18(2)  | 144        | 1-x, 1-y, -z  |
| C38A-H38A...O15 | 0.93   | 2.49     | 3.15(2)  | 128        | -x, 1-y, 1-z  |
| C63A-H63A...O17 | 0.93   | 2.44     | 3.12(2)  | 129        | x, -1+y, 1+z  |
| C13A-H13A...Ow2 | 0.93   | 2.46     | 3.16(3)  | 131        | 1-x, 1-y, 1-z |
| O17...Ow1       |        |          | 2.76(4)  |            |               |
| OW1...Ow2A      |        |          | 2.80(5)  |            | 2-x, -y, 1-z  |
| O17...Ow2       |        |          | 2.96(4)  |            |               |
